# Supplementary material for: Botulinum Toxin for Axial Postural Abnormalities in Parkinson’s Disease: A Systematic Review
Source: MDPI journal article supplement (doi:10.3390/toxins16050228), 2024-05-15
Supplement: s1 [file s1]

**Table S1.** Detailed information of studies evaluating the effects of BoNT A (Group A) and BoNT A combined with physical rehabilitation (Group B) for treating APAs in PD.

| Study ID                                                                    | No. of patients (gender) | PA duration                                                                                                                                                       | Type of Toxin          | Muscles injected                                | Study outcomes and follow-up (if reported) | Main Results                                                                    | QA-LE    |
|-----------------------------------------------------------------------------|--------------------------|-------------------------------------------------------------------------------------------------------------------------------------------------------------------|------------------------|-------------------------------------------------|--------------------------------------------|---------------------------------------------------------------------------------|----------|
| Study design                                                                | Age at evaluation        | Diagnostic criteria of PA, Severity of PA, if reported                                                                                                            | Injection method       | N of injection cycles, if reported              |                                            |                                                                                 |          |
| PD duration                                                                 |                          |                                                                                                                                                                   |                        |                                                 |                                            |                                                                                 |          |
| <b>Group A. Studies evaluating the only effect of BoNT A for APAs in PD</b> |                          |                                                                                                                                                                   |                        |                                                 |                                            |                                                                                 |          |
| Yahalom et al, 2023 [82]                                                    | 1 (M)                    | More than 3 y (requiring surgery for myelopathy)                                                                                                                  | Abobotulinum (Dysport) | Bilateral Medial Scalene (50 U)                 | Neurologic examination                     | Absence of improvement (objective or subjective) of antecollis after BoNT       | Poor - 4 |
| AC                                                                          | -                        | -                                                                                                                                                                 | Method: n.r.           |                                                 |                                            |                                                                                 |          |
| Case series                                                                 | 76 y - 3 y               | n.r - Marked antecollis, bilateral increased tonus of the trapezius pars descendens and of the scalene muscles, without weakness of the cervical extensor muscles |                        | Bilateral Levator Scapulae (25 U)               |                                            |                                                                                 |          |
| Seliverstov et al. 2020 [89]                                                | 2 pts                    | Pt 1: 1 y, Antecollis with mild laterocollis                                                                                                                      | Onabotulinum (Botox)   | Pt 1: Longus Colli: 50 U - Anterior Scalene: 10 | Duration of the Improvement                | Pt 1 4-week follow-up: - Reduction of neck pain in anterior region and enhanced | Fair - 4 |
| AC                                                                          | Pt 1 (F) - 66 y - 11 y   |                                                                                                                                                                   | EMG-guided,            |                                                 |                                            |                                                                                 |          |

|                                    |                                     |                                                                                                                                                                                                                  |                                                                                      |                                                                                                                                                                          |                                          |                                                                                                                                                                                                                                                                                                                                                                                                                        |
|------------------------------------|-------------------------------------|------------------------------------------------------------------------------------------------------------------------------------------------------------------------------------------------------------------|--------------------------------------------------------------------------------------|--------------------------------------------------------------------------------------------------------------------------------------------------------------------------|------------------------------------------|------------------------------------------------------------------------------------------------------------------------------------------------------------------------------------------------------------------------------------------------------------------------------------------------------------------------------------------------------------------------------------------------------------------------|
| Case series                        | Pt 2 (M) -<br>63 y - 8 y            | Pt 2: 5 m<br>-Variability of<br>the posture as<br>well as<br>significant<br>regression in a<br>supine position<br>- Limiting<br>dressing,<br>mobility, and<br>maintenance<br>of social<br>interactions           | patient<br>supine                                                                    | U on each<br>side<br>- Levator<br>Scapulae:<br>15 U/side<br><br>Pt 2:<br>- Longus<br>colli 40<br>U/side                                                                  | Satisfaction<br>rate<br><br>Side effects | capability to<br>sustain a more<br>upright posture<br>of the head-<br>Satisfaction rate<br>40%<br><br>- Side effect: mild<br>dysphagia for 1<br>week<br><br>Pt 2 4-week<br>follow-up:<br>- Improved neck<br>mobility and<br>communication<br>abilities<br>- Satisfaction rate<br>of 30%<br>- Side effects:<br>difficulties in<br>maintaining an<br>upright neck<br>posture;<br>moderate<br>dysphagia for 1.5<br>months |
| Van de Warrenburg et al, 2007 [83] | n=9 PD (3F,6M)<br>-<br>69.1 ± 5.8 y | 2.7 ± 1.4 y<br>-<br>Forward flexion and<br>anterior shift of<br>the neck with<br>prominent<br>cervical<br>paraspinal and<br>levator<br>scapulae<br>muscles,<br>without<br>residual neck<br>extension<br>weakness | Abobotulin<br>um<br>(Dysport):<br>n=7 pt<br><br>Method:<br>EMG prior<br>to injection | Uni/bilatera<br>l Levator<br>scapulae:<br>50-250 U<br><br>Uni/bilatera<br>l<br>Sternocleid<br>omastoid<br>50-100 U<br><br>Uni/bilatera<br>l Splenius<br>capitis 200<br>U | Pain<br><br>Neurologic<br>examination    | The majority of<br>patients did not<br>experience<br>benefits from<br>these injection .<br><br>Pain reduction (1<br>pt)<br><br>Improvement of<br>the AC (2 pts)                                                                                                                                                                                                                                                        |

|                             |                           |                                                                                                        |                                                                                                                                                  |                                                                                                                                                             |                                                                                                                         |                                                                                                                                                                                                                             |          |
|-----------------------------|---------------------------|--------------------------------------------------------------------------------------------------------|--------------------------------------------------------------------------------------------------------------------------------------------------|-------------------------------------------------------------------------------------------------------------------------------------------------------------|-------------------------------------------------------------------------------------------------------------------------|-----------------------------------------------------------------------------------------------------------------------------------------------------------------------------------------------------------------------------|----------|
| Matsumoto et al., 2018 [90] | 1 (M)                     | 5 y                                                                                                    | Onabotulinum (Botox): n=1 patient                                                                                                                | Ipsilateral paraspinal (right) muscles from L2 to L4 spinous processes level                                                                                | Pain Postural improvement by body X-ray and Surface EMG                                                                 | Pain relieved Improvement of posture at body X-ray Increased contralateral tonic contraction of lumbar paraspinal muscles; decreased in tonic contraction of ipsilateral lumbar paraspinal muscles by surface EMG analysis. | Fair - 4 |
| CC+PS Case report           | 6 y                       | LTF (right side) - Severe right abdominal pain requiring access to emergency room                      | Method: palpation of hypertrophic muscle Two cycles, one month apart                                                                             | First session 20 U Second session 30 U                                                                                                                      |                                                                                                                         |                                                                                                                                                                                                                             |          |
| Todo et al., 2018 [84]      | 6 (4F, 2M)                | 2.3 ± 0.8 - Thoracic spine flexion.                                                                    | Onabotulinum (Botox) Method: US guidance, two injections at the intersection of the anterior axillary line and the line level with the umbilicus | Bilateral External Abdominal Oblique muscle (range): 75 to 90 U into each side. 100-120 U into each side as maintenance dose (every 3-4 months, 3 patients) | Short term evaluation at 2 weeks and long term (1 year or more): - CC degree before vs. after BoNT - EMG findings - VAS | Significant mean angle of CC improvement from median of 38° (interquartile: 23.5°) to 18° (interquartile: 21°). 4/6 pts reported subjective relief. VAS of 2 pts with abdominal contraction from 84 and 98 to 4 and 77      | Poor - 4 |
| CC Case series              | 72.5 ± 8.5 - 10.6 ± 5.3 y | Severe symptoms: Abdominal contractions (2 pts), dysbasia (1 pts), difficulty in facing upward (3 pts) |                                                                                                                                                  |                                                                                                                                                             |                                                                                                                         | Long-term: two cases with persistent benefit, one reduced                                                                                                                                                                   |          |

|                             |                                    |                                                                                                                                                                                                                                                                                                                                                     |                                                                                                                      |                                                                                                                                                           |                                              |                                                                                                                                                        |          |
|-----------------------------|------------------------------------|-----------------------------------------------------------------------------------------------------------------------------------------------------------------------------------------------------------------------------------------------------------------------------------------------------------------------------------------------------|----------------------------------------------------------------------------------------------------------------------|-----------------------------------------------------------------------------------------------------------------------------------------------------------|----------------------------------------------|--------------------------------------------------------------------------------------------------------------------------------------------------------|----------|
| Wijemanne et al., 2014 [94] | 1 (F)<br>-<br>66 y<br>-<br>7 y     | 2 y (and history of left Transverse Rectus Abdominis Myocutaneous flap procedure for breast reconstruction)<br>-<br>Palpable abdominal contractions in standing position.<br>Pt was unable to lie flat on her back and had to lean upright against a wall.<br>-<br>Painful abdominal contractions with a 45-degree forward spine flexion in the OFF | Onabotulinum (Botox)<br><br>Method: EMG-guided<br><br>Two cycles, at a distance of 8 weeks<br>Then, every 3-4 months | First injection: 200 U for each Rectus Abdominis<br><br>Second injection: 200 U in left External Abdominal Oblique<br><br>200 U in right Rectus Abdominis | Anterior trunk flexion degree over 18 months | CC maintained a 15-20° improvement in the 'ON' state with a UPDRS score of 8, compared to 30° in the 'OFF' state, showing good response over 18 months | NA - 4   |
| Colosimo et al., 2009 [86]  | 2 (n.r.)<br>-<br>n.r               | n.r<br>-<br>Reducible forward flexion of the thoracolumbar spine > 45°<br>-<br>Severe CC                                                                                                                                                                                                                                                            | Onabotulinum (Botox)<br><br>Method: CT guidance                                                                      | 300 U for each Iliopsoas (deep lumbar portion):<br><br>200 U for each Rectus Abdominis                                                                    | Clinical evaluation                          | No objectively or subjective improvement of CC at 1 day, 1 week, and 2 weeks after BoNT injection                                                      | Poor - 4 |
| Fietzek et al., 2009 [85]   | 10 (M/F n.r.)<br>n=5 (age 70 ± 4.5 | Iliopsoas group (1.9 ± 0.2),<br>Rectus abdominis                                                                                                                                                                                                                                                                                                    | Incobotulinum (Xeomin)                                                                                               | 50 U per site<br><br>Bilateral Iliopsoas (4-                                                                                                              | After 3 weeks:                               | No improvement                                                                                                                                         | Poor - 4 |

|                                  |                                                                                        |                                                                                                                                                                                                                                                  |                        |                                                                                                                                                                                                           |                                                                                                                                                               |                                                                                                                                    |
|----------------------------------|----------------------------------------------------------------------------------------|--------------------------------------------------------------------------------------------------------------------------------------------------------------------------------------------------------------------------------------------------|------------------------|-----------------------------------------------------------------------------------------------------------------------------------------------------------------------------------------------------------|---------------------------------------------------------------------------------------------------------------------------------------------------------------|------------------------------------------------------------------------------------------------------------------------------------|
| Goal attainment controlled study | y) injected in the Iliopsoas n= 5 (age 75.4 ± 1.6 y) injected in the rectus abdominis) | group (3.0 ± 1.4) - n.r. - Treatment goals included achieving a more upright gait (N=6), pain relief (N=3), enabling the grasping of previously unreachable items (N=3), facilitating social activities (N=2), and reducing stigmatization (N=3) | Method: US guidance    | 6 sites) muscle injected directly below the inguinal ligament with two to three sites (mean dosage 210 ± 50 U)                                                                                            | - Timed Up&Go 10 m - Goal attainment                                                                                                                          |                                                                                                                                    |
| Von Coelln et al., 2008 [91]     | 3 (M) - 75y, 73y, 70y                                                                  | 3y, 1y, 1.5y - Abnormal trunk posture with marked thoracolumbar spine flexion when standing and walking, which lessens in the supine position                                                                                                    | Abobotulinum (Dysport) | Unilateral, ipsilateral Psoas Major (n=2 PD with trunk deviation forward and toward the right side); Bilateral Psoas Major involvement (n=1 PD with pure forward flexion), treated via a ventral approach | Evaluation at 2, 4, and 16 weeks after each treatment: - Detailed interview - Physical examination - Body height (spontaneous and in maximal effort to stand) | All pts complained of mild to moderate weakness of hip flexion at the highest dose of BoNT. Limited or no efficacy in all patients |

|                            |                  |                                                                                                                                                  |                          |                                                        |                                                                                                                                                                                                                                                                                    |                                                            |             |  |
|----------------------------|------------------|--------------------------------------------------------------------------------------------------------------------------------------------------|--------------------------|--------------------------------------------------------|------------------------------------------------------------------------------------------------------------------------------------------------------------------------------------------------------------------------------------------------------------------------------------|------------------------------------------------------------|-------------|--|
|                            |                  |                                                                                                                                                  |                          |                                                        | above the<br>inguinal<br>ligament,<br>along the<br>muscle's<br>longitudina<br>l axis<br>Initial dose:<br>500 U/side<br><br>Retreatmen<br>t every 4-6<br>months<br>with a total<br>of 16<br>injections,<br>dosage<br>increased<br>by 500 U to<br>a maximum<br>of 1500 U<br>per side |                                                            |             |  |
| Azher et al.,<br>2005 [35] | 6 (4M,<br>2F)    | 3.8 ± 2.1 y<br>-<br>A significant                                                                                                                | Onabotulin<br>um (Botox) | Rectus<br>Abdominis<br>(4 pts, range<br>150-400 U)     | Clinical<br>effect and<br>its duration                                                                                                                                                                                                                                             | Good response in<br>3 pts (8 weeks, 14<br>weeks, 24 weeks) | Poor -<br>4 |  |
| CC                         | 67.2 ± 6 y<br>-  | (>45°) flexion of<br>the                                                                                                                         | Method: n.r.             | Paraspinal<br>muscles (2<br>pts, 200 U)                |                                                                                                                                                                                                                                                                                    | Not reports of 3<br>pts                                    |             |  |
| Case series                | 12 ± 7.2 y       | thoracolumbar<br>spine that<br>intensifies<br>during walking<br>and<br>substantially<br>decreases or<br>vanishes in the<br>recumbent<br>position |                          | Paraspinal<br>muscles (2<br>pts,<br>unknown<br>dosage) |                                                                                                                                                                                                                                                                                    |                                                            |             |  |
| Ledda et al<br>2023 [92]   | 13 (8 M,<br>5 F) | 4.1 ± 5<br>-<br>PS: >10 degrees                                                                                                                  | Onabotulin<br>um (Botox) | 1 <sup>st</sup> injection:<br>50 U<br>longissimus      | Short -term<br>(4 months)<br>and                                                                                                                                                                                                                                                   | Short-term (13<br>pts):<br>No improvement                  | (13<br>4    |  |
| PS                         | 68.8 ± 9<br>-    | of LTF,<br>manifests                                                                                                                             | Method: US<br>guidance   | thoracis and<br>50 U                                   |                                                                                                                                                                                                                                                                                    | of angle of LTF<br>and VAS                                 |             |  |

|                                                                    |                                                                                                   |                                                                                                                                                                                                                            |                                                                                                                                                                                                                      |                                                                                                                                                                                                                                                                           |                                                                                                                                                       |                                                                                                                                                                                                                                                                                                 |
|--------------------------------------------------------------------|---------------------------------------------------------------------------------------------------|----------------------------------------------------------------------------------------------------------------------------------------------------------------------------------------------------------------------------|----------------------------------------------------------------------------------------------------------------------------------------------------------------------------------------------------------------------|---------------------------------------------------------------------------------------------------------------------------------------------------------------------------------------------------------------------------------------------------------------------------|-------------------------------------------------------------------------------------------------------------------------------------------------------|-------------------------------------------------------------------------------------------------------------------------------------------------------------------------------------------------------------------------------------------------------------------------------------------------|
| Longitudinal observation study and case-control                    | 12.7 ± 6.2<br>Control pts (untreated): 7 PD pts with PS (4 M, 3 F)<br>- 69.7 ± 3.2<br>- 7.7 ± 5.8 | when sitting or standing .<br>LTF: involuntary lateral trunk bending, 5 to 10 degrees-<br>Baseline standing flexion angle: 11.2 ± 4.6 degrees; back pain VAS score: 6 ± 3<br>Controls baseline angle of flexion 15.1 ± 4.3 | EMG:<br>a) Seated without upper limb or trunk support.<br>b) With trunk held upright and straight by an operator<br>c) during patient's self-realignment of the trunk.<br>4 BoNT cycles, administered every 4 months | iliocostalis lumborum ipsilateral to LTF<br>From 2 <sup>nd</sup> injection: personalized treatment based on US and EMG (longissimus thoracis and/or iliocostalis lumborum muscles with pathological muscular hyperactivity, from 15 to 50 units for each injected muscle) | Long-term (12 months):<br>- Posture assessment (NeuroPosture APP)<br>- VAS score                                                                      | Long-term (7 pts): Mild improvement of angle of LTF (from 10.4 ± 2.8 to 9.2 ± 6.4 degrees)<br><br>Angle of LTF in controls at long-term (18 months): 20.2 ± 7.4 degrees<br><br>Significant differences in LTF degree changes over time between treated and untreated control groups (p = 0.026) |
| Artusi et al., 2019 [88]<br><br>PS<br><br>Prospective, pilot study | 13 (10M, 3F)<br>- 70.5 ± 8.5 y<br>- Age at PD onset 60.0 ± 12.0 y                                 | 2.7 ± 2.3 y -<br>LTF ≥ 10°<br>improved by passive mobilization and supine positioning.                                                                                                                                     | Onabotulinum (Botox)<br><br>MRI to assess atrophy of paraspinal and non-paraspinal axial muscles<br><br>Method: US and EMG-guided. EMG was                                                                           | Muscle selection: hyperactivity on EMG when standing (if not available, based on lying findings); absence of severe muscle atrophy on MRI.                                                                                                                                | Postural improvement observed two months after BoNT injection.<br><br>Degrees of LTF changes measured using a wall goniometer and "ImageJ," with a 5° | The rate of Good responders was ~2c<br>84.6% (n= 11/13)<br><br>LTF angle improved by 40%, from 15.7 ± 8.4 to 9.4 ± 11.8 degrees.<br><br>Pain reduction was 52.2% in total VAS score, from 6.9 ± 2.2 to 3.3 ± 1.6                                                                                |

|                            |              |                                                         |                 |                                             |                                                                                                                |                                                                                                                  |                                                                |                                                       |
|----------------------------|--------------|---------------------------------------------------------|-----------------|---------------------------------------------|----------------------------------------------------------------------------------------------------------------|------------------------------------------------------------------------------------------------------------------|----------------------------------------------------------------|-------------------------------------------------------|
|                            |              |                                                         |                 |                                             | conducted in lying down prone on an examination table with arms along the trunk, and then in standing position | Paraspinal muscles at L2-L4 (longissimus thoracis, iliocostalis lumborum, and spinalis dorsi) (range: 50 - 75 U) | cut-off defining significant improvement.                      | No procedural or post-procedural adverse events (AEs) |
|                            |              |                                                         |                 |                                             |                                                                                                                | Non paraspinal muscles (abdominal oblique and Iliopsoas) (range 25 to 50 U)                                      |                                                                |                                                       |
| Dupeyron et al., 2015 [95] | 1 (F) - 69 y | A tonic side complete resolution                        | LTF one with in | Incobotulinum (Xeomin) EMG before injection | First injection: 50 U in two sites (T10 and L3 level), of left iliocostalis (Ipsilateral) muscle               | Clinical improvement with pictures                                                                               | Six weeks after first injection pain improved, but not PS.     | NA - 4                                                |
| PS                         | - 10 y       | supine position and increased deviation during standing |                 |                                             | Second injection, three months after: 50 U in two sites of ipsilateral quadratus                               |                                                                                                                  | Improvement of PS after second injection, lasting for one year |                                                       |



|                           |                |                                                                                 |                                                                                                                                                                                                                                                               | lumborum muscle                                                                                                                                                                                                                                                              |                                                                                                              |                                                                                                                                                                                                         |          |  |
|---------------------------|----------------|---------------------------------------------------------------------------------|---------------------------------------------------------------------------------------------------------------------------------------------------------------------------------------------------------------------------------------------------------------|------------------------------------------------------------------------------------------------------------------------------------------------------------------------------------------------------------------------------------------------------------------------------|--------------------------------------------------------------------------------------------------------------|---------------------------------------------------------------------------------------------------------------------------------------------------------------------------------------------------------|----------|--|
| Bonanni et al., 2007 [93] | 9 (5M,4F)      | 2.4 ± 0.9 y                                                                     | Abobotulinum (Dysport): 500 U                                                                                                                                                                                                                                 | Injection of 125 U into four sites of paraspinal muscles, 2 to 2.5 cm lateral to the spinous processes at levels L2-L5, on the ipsilateral to the bend                                                                                                                       | Evaluation at 2 and 4 weeks, and at 3 months: - TDDS - VAS - Goniometric measurement of the LTF displacement | At 1 month, n=6 pts showed an improvement of lateral bending from 50% to 85.7% and reduction of pain                                                                                                    | Fair - 4 |  |
| PS                        | BoNT treatment | LFT ≥ 15° that increase during walking and disappear in the recumbent position. | Method: EMG-guided (to evaluate continuous EMG activity of lumbar paraspinal muscles on the same side as the bend, occurring only when the patient is standing or walking. Baseline VAS 68.3 ± 11.3 Baseline TDSS 7 ± 2.8 Baseline bending degrees 30.6 ± 6.9 | continuous EMG activity of lumbar paraspinal muscles ipsilateral to the bending side, appearing only when standing or walking, disappearing in lateral recumbent position - Following the blinded evaluation, BoNT injections were repeated quarterly over a two-year period | -                                                                                                            | Pts treated with BoNT showed an average improvement of 4 points on the TDDS score and a 31.4 mm average reduction in pain, with improvements ranging from 24.1% to 76.4% on the VAS scale from baseline |          |  |

**Group B. Studies of BoNT combined with physical rehabilitation for APAs in PD**

|                              |                                                                                                                                                              |                                                                                                                                            |                                                                                                                     |                                                                                                                                         |                                                                                                                                                                                                                                                                          |                                                                                                                                                                      |           |
|------------------------------|--------------------------------------------------------------------------------------------------------------------------------------------------------------|--------------------------------------------------------------------------------------------------------------------------------------------|---------------------------------------------------------------------------------------------------------------------|-----------------------------------------------------------------------------------------------------------------------------------------|--------------------------------------------------------------------------------------------------------------------------------------------------------------------------------------------------------------------------------------------------------------------------|----------------------------------------------------------------------------------------------------------------------------------------------------------------------|-----------|
| Tassorelli et al., 2014 [87] | 26 patients                                                                                                                                                  | Group A: 3.1 ± 1.9 y<br>Group B: 3.0 ± 1.5.                                                                                                | Incobotulinum (Xeomin)                                                                                              | Maximum 6 sites per patient, with a maximum dose of 50 UI of BoNT per site, with a total dose per patient ranging between 50 to 200 UI. | Evaluation at the end of rehab, and 3 and 6 months after.<br>- VAS of back pain<br>- UPDRS score<br>- FIM score<br>- Degree of anterior trunk flexion<br>- trunk ROM on the 4 plans<br>- Kinematic analysis<br>- Lateral inclination and anterior flexion while standing | Groups A and B improved significantly in static postural alignment and ROM at the end of the treatment period (BoNT/saline + rehabilitation)..                       | Good – 1b |
| PS+CC RCT                    | n=13 group A (8F, 5M)<br>n=13 group B placebo (6F, 7M)<br>- Group A 73.9 ± 4.3 y<br>Group B 74.2 ± 5.1 y<br>- Group A 10.2 ± 8.2 y,<br>Group B 10.4 ± 10.1 y | PS: mild to moderate LTF (Cobb's angle >10°),<br>CC: static anterior trunk flexion<br>- VAS group A = 6.7 ± 1.5<br>VAS group B = 5.4 ± 2.5 | Method: EMG-guided (injection if involuntary tonic activity longer than 500 ms)<br>- Rehab: 5 days/week for 4 weeks | Bilateral Iliopsoas, ipsilateral or contralateral Multifidus, Rectus Abdominis, inferior thoracic and lumbar paravertebral muscles      |                                                                                                                                                                                                                                                                          | Group A exhibited a significantly more reduction in pain scores compared to Group B, and also a longer-lasting efficacy on several clinical and kinematic variables. |           |
| Santamato et al., 2010 [96]  | 1 M<br>n.r.                                                                                                                                                  | n.r.-<br>Significant deviation of the trunk to the right                                                                                   | Abobotulinum (Dysport)                                                                                              | Bilateral paraspinous muscles (2–2.5 cm lateral to the spinous processes, T10-L2)                                                       | LTF angle<br>TDDS<br>VAS                                                                                                                                                                                                                                                 | 15 days after: improvement of PS from 35° to 15°, improvement of 5 points in TDDS, and a reduction of VAS score from 7 to 3                                          | NA - 4    |
| PS Case report               |                                                                                                                                                              |                                                                                                                                            | Method: EMG recordings + multidisciplinary rehabilitation program                                                   | 600 U distributed across 6                                                                                                              |                                                                                                                                                                                                                                                                          | After 3 months, the improvement                                                                                                                                      |           |

|            |   |              |                |
|------------|---|--------------|----------------|
|            |   | injection    | appeared to be |
| Rehab:     | 5 | sites (100 U | maintained     |
| days/week, |   | per site)    |                |
| After      | 3 |              |                |
| months     |   |              |                |
| reduced to |   |              |                |
| 3days/week |   |              |                |

Abbreviations: APAs, Axial Postural Abnormalities; BoNT, Botulinum toxin; CC, Camptocormia; CT, Computed tomography; EMG, Electromyography; US, ultrasound; M, Male; F, Female; FIM, Functional Independence Measure; LE, Levels of Evidence; LTF, Lateral trunk flexion; ms, milli-seconds; PD, Parkinson's disease; PS, Pisa syndrome; AC, Antecollis; Pt, patient; ROM, range of motion; SD, Standard deviation; U, units; QA, Quality of Assessment; RCT, Randomized Controlled Trial; TDDS, Trunk Dystonia Disability Scale; UPDRS, Unified Parkinson's Disease Rating Scale; US, Ultrasound; VAS: Visual Analogue Scale; y, years; NA, not available; n.r., not reported.

### Supplementary S1

This section provides detailed information on the search strategy for all databases. Pubmed

(Pisa syndrome OR lateral trunk flexion OR Camptocormia OR Anterior trunk flexion OR Forward trunk flexion OR Retrocollis OR Anterocollis OR Stooped posture OR Spinal curvatures OR Antecollis OR Cervical Dystonia OR torticollis) AND (Parkinsonian disorders OR Parkinson Disease OR Multiple System Atrophy OR Progressive Supranuclear Palsy OR Dementia OR Lewy body OR Corticobasal syndrome OR Axial manifestation OR Postural syndrome)) AND ("Surgical Procedures, Operative"[Mesh]) OR ("Orthopedic Equipment"[Mesh] OR corset) OR ("Chemicals and Drugs Category"[Mesh] OR drug) OR (treatment OR "Therapeutics"[Mesh] OR Therapy OR rehabilitation) AND (outcome OR evaluation OR effect OR result OR efficacy OR assessment) AND (severity OR posture OR walking OR postural OR balance OR equilibrium OR gait OR deambulation)

Web of Science All databases

("Parkinsonian disorders" OR "Parkinson Disease" OR "Multiple System Atrophy" OR "Progressive Supranuclear Palsy" OR "Dementia" OR "Lewy body" OR "Corticobasal syndrome" OR "Axial manifestation" OR "Postural syndrome") AND ("Pisa syndrome" OR "lateral trunk flexion" OR Camptocormia OR "Anterior trunk flexion" OR "Forward trunk flexion" OR Retrocollis OR Anterocollis OR "Stooped posture" OR "Spinal curvatures" OR Antecollis OR "Cervical Dystonia" OR torticollis) AND (outcome OR evaluation OR effect OR result OR efficacy OR assessment OR evaluate OR assess) AND (severity OR posture OR walking OR postural OR balance OR equilibrium OR gait OR deambulation) AND (surg\* OR drug OR therap\* OR rehabilit\* OR stimulation OR exercise OR manipulation OR ortho\* OR corset OR walker OR crunches OR lidocaine OR pallidotomy)

### SCOPUS

("Parkinsonian disorders" OR "Parkinson Disease" OR "Multiple System Atrophy" OR "Progressive Supranuclear Palsy" OR "Dementia" OR "Lewy body" OR "Corticobasal syndrome" OR "Axial manifestation" OR "Postural syndrome") AND ("Pisa syndrome" OR "lateral trunk flexion" OR Camptocormia OR "Anterior trunk flexion" OR "Forward trunk flexion" OR Retrocollis OR Anterocollis OR "Stooped posture" OR "Spinal curvatures" OR Antecollis OR

---

"Cervical Dystonia" OR torticollis) AND (outcome OR evaluation OR effect OR result OR efficacy OR assessment OR evaluate OR assess) AND (severity OR posture OR walking OR postural OR balance OR equilibrium OR gait OR deambulation) AND (surg\* OR drug OR therap\* OR rehabilit\* OR stimulation OR exercise OR manipulation OR ortho\* OR corset OR walker OR crunches OR lidocaine OR pallidotomy)
